# Supplementary material for: A Novel Fluorescent Immuno-Lectin Assay to Identify Osteoarthritis Associated Glycoforms of Lubricin
Source: bioRxiv or medRxiv preprint supplement (doi:10.1101/2024.01.02.23300279), 2024-01-03
Supplement: Supplementary file [file media-1.pdf]

**Supplementary Table 1: Comparison of FILA levels between OA and control plasma lubricin glycoforms in individuals with BMI<30 and for all individuals**

| Glycoforms       | <sup>a</sup> All individuals |         | <sup>b</sup> BMI<30   |          |
|------------------|------------------------------|---------|-----------------------|----------|
|                  | Median (Control / OA)        | p-value | Median (Control / OA) | p-value  |
| <b>Gal-3</b>     | 4.195 / 4.519                | 0.3037  | 3.991 / 4.167         | 0.7441   |
| <b>MAA</b>       | 1.007 / 1.010                | 0.9360  | 1.071 / 0.8970        | 0.2007   |
| <b>PNA</b>       | 0.2998 / 0.3345              | 0.9912  | 0.2891 / 0.3179       | 0.6017   |
| <b>SNA</b>       | 1.191 / 1.053                | 0.0610  | 1.198 / 0.8950        | 0.0023** |
| <b>MGL</b>       | 0.00160 / 0.00158            | 0.4436  | 0.001681 / 0.001604   | 0.5524   |
| <b>Gal-3/MGL</b> | 2820 / 2567                  | 0.6174  | 2744 / 2488           | 0.4276   |
| <b>MAA/MGL</b>   | 610.0 / 635.0                | 0.7379  | 599.2 / 615.2         | 0.3703   |
| <b>PNA/MGL</b>   | 240.4 / 217.1                | 0.3009  | 229.3 / 189.0         | 0.2007   |
| <b>SNA/MGL</b>   | 793.2 / 618.6                | 0.0931  | 756.0 / 517.2         | 0.0178*  |

<sup>a</sup> (total n=224), (Controls: n=41), (OA: n=183)

<sup>b</sup> (total n=146), (Controls: n=38), (OA n=108)

**Supplementary Table 2: Correlation between glycoforms and BMI**

| Correlation between <b>BMI</b> and lectins in control and OA samples |            |              |            |            |            |            |
|----------------------------------------------------------------------|------------|--------------|------------|------------|------------|------------|
|                                                                      |            | <b>Gal-3</b> | <b>MAA</b> | <b>PNA</b> | <b>SNA</b> | <b>MGL</b> |
| <b>OA</b><br>(n=183)                                                 | Spearman r | 0.1794       | 0.2453     | 0.1373     | 0.2449     | -0.00615   |
|                                                                      | p-value    | 0.0151 *     | 0.0008 *** | 0.0638     | 0.0008 *** | 0.9342     |
| <b>Controls</b><br>(n=41)                                            | Spearman r | 0.1235       | 0.04906    | 0.09891    | 0.1522     | -0.06903   |
|                                                                      | p-value    | 0.4418       | 0.7607     | 0.5384     | 0.3420     | 0.6681     |
| <b>All</b><br>(n=224)                                                | Spearman r | 0.1653       | 0.2039     | 0.1255     | 0.1963     | -0.01051   |
|                                                                      | p-value    | 0.0133 *     | 0.0022 **  | 0.0607     | 0.0032 **  | 0.8757     |

**Supplementary Table 3: Correlation between glycoforms and age**

| Correlation between <b>Age</b> and lectins in control and OA samples |            |              |            |            |            |            |
|----------------------------------------------------------------------|------------|--------------|------------|------------|------------|------------|
|                                                                      |            | <b>Gal-3</b> | <b>MAA</b> | <b>PNA</b> | <b>SNA</b> | <b>MGL</b> |
| <b>OA</b><br>(n = 183)                                               | Spearman r | -0.1084      | -0,1500    | -0,02542   | -0,1470    | 0,1769     |
|                                                                      | P-value    | 0.1441       | 0,0426*    | 0,7327     | 0,0471*    | 0,0166*    |
| <b>Controls</b><br>(n = 41)                                          | Spearman r | 0.2459       | -0.05855   | 0.2807     | 0.01311    | 0.06493    |
|                                                                      | P-value    | 0.1212       | 0.7161     | 0.0755     | 0.9352     | 0.6867     |
| <b>All</b><br>(n = 224)                                              | Spearman r | -0.03545     | -0.01338   | 0.02981    | -0.0149    | 0.1683     |
|                                                                      | P-value    | 0.5976       | 0.0455*    | 0.6572     | 0.0258*    | 0.0117*    |
